# Supplementary material
Source: MDPI journal article supplement (https://www.mdpi.com/2311-7524/10/5/522)
Supplement: s1 [file s1]

Archive with 7 entries (7 files):
- Supplementary Figures S1-S18.pdf
- Supplementary Table S1.xlsx
- Supplementary Table S2.xlsx
- Supplementary Table S3.xlsx
- Supplementary Table S4.xlsx
- Supplementary Table S5.xlsx
- Supplementary Table S6.xlsx
