# Supplementary material
Source: MDPI journal article supplement (https://www.mdpi.com/2311-7524/10/5/522)
Supplement: s1 [file s1 › Supplementary Table S1.xlsx]

## Sheet: Table S1
Table S1. Primers used in this study.
Primer name	Primer sequence	Function
SlYTP3-F	ATGCCATCAGATACTGCAAGAG	Gene clone
SlYTP3-R	TTAGTGACTTCTCCTTTTCTTCG
SlYTP4-F	ATGGACGAAGGAGAAGGGGG
SlYTP4-R	TTACTGACACCTATTTTCTGAGCCA
SlYTP5-F	ATGGCTGCTGGTGCTCCTC
SlYTP5-R	TTAGCATCCATTAGAAGCCCCA
SlYTP6-F	ATGGAGGATACCAATCAGCAGA
SlYTP6-R	TCAAGGCAACTTCTTGTTGCC
SlYTP7-F	ATGGATGACGGAGAAGGAGGA
SlYTP7-R	TTACTTTTCTGTGCCAGTAGTAGC
SlYTP8-F	ATGTATAATGAAGGAGCCCCTG
SlYTP8-R	TCACTTAAGGACCTTTTTTCCAGAC
SlYTP9-F	ATGGCTGGTGAGAAGATTATAGA
SlYTP9-R	TCAGACACTACTTTTGAATGGC
RT-SlYTP3-F	ACACTGAAATGGGTCGTCAAAT	RT-PCR
RT-SlYTP3-R	GTACTCCGTGATGGTCCTGAA
RT-SlYTP4-F	TCCATCATTCATTCCACCCTCA
RT-SlYTP4-R	GCACTCCATCTGGTCCATTAAC
RT-SlYTP5-F	AGTCGGCTGATCGGTCTGT
RT-SlYTP5-R	TCCAGGCATCTCAACTCCATC
RT-SlYTP6-F	TTACGACAATGGCACTGGAAG
RT-SlYTP6-R	GGAGAAAGAGGACTAGCAATGG
RT-SlYTP7-F	CCTTTCATGGGTGGAATGGG
RT-SlYTP7-R	TGGACCTGAACTGAATCTATCG
RT-SlYTP8-F	ACCTGGTGATTGGGATGGC
RT-SlYTP8-R	AGGAATGTAAGGGTTGTATGGG
RT-SlYTP9-F	TATCTCCAGCAACCTGTCTCAT
RT-SlYTP9-R	CCATTCGACTTGACTGAACCAT
SlACTIN-F	GTCCTCTTCCAGCCATCCA
SlACTIN-R	ACCACTGAGCACAATGTTACCG
2301-GUS-F	ATGTTACGTCCTGTAGAAAC	Transgenetic tomato identification
2301-GUS-R	CGCGTGGTTACAGTCTTGCG
GFP-SlYTP8-F	AGCTCGGTACCCGGGGATCCATGTATAATGAAGGAGCCCCTGA	Vector construction
GFP-SlYTP8-R	CTTGCTCACCATGGTGTCGacCTTAAGGACCTTTTTTCCAGACCCA
GFP-SlYTP9-F	AGCTCGGTACCCGGGGATCCATGGCTGGTGAGAAGATTATAGA
GFP-SlYTP9-R	CTTGCTCACCATGGTGTCGacGACACTACTTTTGAATGGCCTT
