# Supplementary material
Source: MDPI journal article supplement (https://www.mdpi.com/2311-7524/10/5/522)
Supplement: s1 [file s1 › Supplementary Table S2.xlsx]

## Sheet: Table S2
Table S2. Information of SlYTP genes and the predicated proteins in Solanum lycopersicum.
Gene symbol	Gene locus	Chromosome location	CDS length (bp)	Protein length (aa)	Protein MW (kDa)	Protein PI	YTH domain
SlYTP1	Solyc08g007730.2	Solyc08:2237471-2256134	1188	395	44.2	6.39	Y/1
SlYTP2	Solyc08g007750.4	Solyc08:2258006-2278347	1110	369	41.1	6.52	Y/1
SlYTP3	Solyc08g007760.3	Solyc08:2281863-2292235	1185	394	44.3	6.1	Y/1
SlYTP4	Solyc02g021760.3	Solyc02:22050421-22066657	2070	689	75.9	6.24	Y/1
SlYTP5	Solyc01g028860.3	Solyc01:36926731-36931286	2121	706	77.2	6.95	Y/1
SlYTP6	Solyc05g032850.3	Solyc05:43261675-43271496	1815	604	65.9	5.31	Y/1
SlYTP7	Solyc02g070240.3	Solyc02:38004241-38018619	2016	671	73.8	6.1	Y/1
SlYTP8	Solyc12g099090.3	Solyc12:65890576-65899123	2073	690	75.3	6.45	Y/1
SlYTP9	Solyc01g103540.3	Solyc01:84417121-84423261	1668	555	61.5	8.65	Y/1
