# Supplementary material
Source: MDPI journal article supplement (https://www.mdpi.com/2311-7524/10/5/522)
Supplement: s1 [file s1 › Supplementary Table S3.xlsx]

## Sheet: Table S3
Table S3. Sequences of SlYTPs download from tomato genome database and obtained from gene cloning.
Gene name	Gene ID	Length (bp)	Sequences download from tomato genome database	Sequences obtained from gene cloning	Sequence alignment rate
SlYTP1	Solyc08g007730.2	1188	ATGCCATCAGATACTGCAAGAAAAAATGCAGCTATAGCTAATTCCATAGTGACCGACTACAAAAATGAAAGAAGGAATTTTGACGGACCAGATAGTTCATGCCTCAGAGTAAATGAGGATACCAATCGTTCTATAGCAGAGGAGCTCACACTTTCATCTCCGCCGATTGGAATTTCAACTGCAATTGAAAAGGGTAAACTCTATAGCATAAGATATTTTGTAATCAAGAGTTTGAACCATGAAAATATCCAATTATCAGTAAACAGAGGGATTTGGGCTACTCAAGCCATGAATGAGGCCATTTTGGATGAAGCATTTCATAATTCCAGCAAGGTTATACTAATATTCAGTGTCAACACTAGTGGGTATTTCCAAGGGTATGCCCAAATGATTTCTTCT…	-	-
SlYTP2	Solyc08g007750.4	1110	ATGAAAGAAGGAATTCTGACGGACCAGACATATAGTTCATGCCTCGGAGTTATTGAGGGTGGTGAGTTCACAGTTTCATCTCCGTCGACTGGAATTTCAAGTGCAATTGAAAAGGGTAAACTCTATGGCATAAGATATTTTGTAATCAAGAGTTTAAACCATGAAAATATCCAATTATCAGTAAACAGAGGGATTTGGGCTACTCAAGCCATGAATGAGGCCATTTTGGATGAAGCATTTCATAATTCCAGCAAGGTTATACTAATATTCAGTGTCAACATGAGTGGGTATTTCCAAGGGTACGCCCAAATGATTTCTTCTGTCGGTTTGAGAAGAGACCAAGTTTGGAGTCAAGGAAATGGTGGTCGTAATCCTTGGGGTCGAAGCTTTGAAGTGAAT…	-	-
SlYTP3	Solyc08g007760.3	1185	ATGCCATCAGATACTGCAAGAGAAAATGCATCTATAGCTAATTCCATTGAGACCGACTGGAAAAATGAAAGAGGGAATCTTGGCGGACCAGATAGTTCAAGCCTCAGAGTTAATGAGGACACGAATCGTTCTATAGCAGAGGAGCTCACTTCATCTCTGCCAATTGGAATTTCAAGTGCAATTGAAAAGGGTAAACTCTATAGCATAAGATATTTTGTAATCAAGAGTTTGAACCATGAAAATATCCAATTATCAGTAAACAGAGGGATTTGGGCTACTCAAGCCATGAATGAGGCCATTTTGGATGAAGCATTTCATAATTCCAGCAAGGTTATACTAATATTCAGTGTCAACATGAGTGGGTATTTCCAAGGGTACGCCCAAATGATTTCTTCAGTC…	ATGCCATCAGATACTGCAAGAGAAAATGCATCTATAGCTAATTCCATTGAGACCGACTGGAAAAATGAAAGAGGGAATCTTGGCGGACCAGATAGTTCAAGCCTCAGAGTTAATGAGGACACGAATCGTTCTATAGCAGAGGAGCTCACTTCATCTCTGCCAATTGGAATTTCAAGTGCAATTGAAAAGGGTAAACTCTATAGCATAAGATATTTTGTAATCAAGAGTTTGAACCATGAAAATATCCAATTATCAGTAAACAGAGGGATTTGGGCTACTCAAGCCATGAATGAGGCCATTTTGGATGAAGCATTTCATAATTCCAGCAAGGTTATACTAATATTCAGTGTCAACATGAGTGGGTATTTCCAAGGGTACGCCCAAATGATTTCTTCAGTC…	1
SlYTP4	Solyc02g021760.3	2070	ATGGACGAAGGAGAAGGGGGTTTGAATTTTGATTTTGAAGGTGGCTTAGACACTGGGCCAACACACCCAACTGCATCAGTTCCAGTAATACAATCTTTCGATCACACTGCAGCAGCTGCTTCAAGTGCTAATATTAACCCGCCTACTGTCCCAGCGGTTGGTGGCCAAGGCGATGTAGGATTTGTTGGAAATCGTCGGAGTTTCAGGCAGACTGTTTGCCGCCACTGGCTGCGGTCACTGTGTATGAAGGGTGATGCCTGCGGCTTCCTTCACCAGTATGACAAATCACGAATGCCCATTTGTCGCTTCTTTCGACTCTATGGTGAGTGCCGTGAACAGGACTGTGTTTATAAGCACACGATTGAGGATATCAAGGAATGCAACATGTACAAATTGGGG…	ATGGACGAAGGAGAAGGGGGTTTGAATTTTGATTTTGAAGGTGGCTTAGACACTGGGCCAACACACCCAACTGCATCAGTTCCAGTAATACAATCTTTCGATCACACTGCAGCAGCTGCTTCAAGTGCTAATATTAACCCGCCTACTGTCCCAGCGGTTGGTGGCCAAGGCGATGTAGGATTTGTTGGAAATCGTCGGAGTTTCAGGCAGACTGTTTGCCGCCACTGGCTGCGGTCACTGTGTATGAAGGGTGATGCCTGCGGCTTCCTTCACCAGTATGACAAATCACGAATGCCCATTTGTCGCTTCTTTCGACTCTATGGTGAGTGCCGTGAACAGGACTGTGTTTATAAGCACACGATTGAGGATATCAAGGAATGCAACATGTACAAATTGGGG…	0.9981
SlYTP5	Solyc01g028860.3	2121	ATGGCTGCTGGTGCTCCTCCTGCTGATCAAGCTGCAGATTTGCTGCAGAATTTGTCACTGGATTCTCGGAATAAGACTCTTGAAATTGCAGATACAAAAAAGAAGCCTTCTGGGAACCCTACAGATGGGGCAAACGGTCAGCTTCAGTCGGCTGATCGGTCTGTGACACCTGTGTTGCCAGAATTCATGGATCCAAATTTGTGCTATGTTCCTAACAGTTATGCCTCAACAGCATACTATTATGGATATGATGCTTCTGCTAACGAGTGGGAGGACTATGCACGATATACGAATCCGGATGGAGTTGAGATGCCTGGAGTTTATGGAGACAACAGTTCACTTATCTATCATCATGCCTATGGTTATGCACCCTATAGTCCATATTCACCTGCTACTTCG…	ATGGCTGCTGGTGCTCCTCCTGCTGATCAAGCTGCAGATTTGCTGCAGAATTTGTCACTGGATTCTCGGAATAAGACTCTTGAAATTGCAGATACAAAAAAGAAGCCTTCTGGGAACCCTACAGATGGGGCAAACGGTCAGCTTCAGTCGGCTGATCGGTCTGTGACACCTGTGTTGCCAGAATTCATGGATCCAAATTTGTGCTATGTTCCTAACAGTTATGCCTCAACAGCATACTATTATGGATATGATGCTTCTGCTAACGAGTGGGAGGACTATGCACGATATACGAATCCGGATGGAGTTGAGATGCCTGGAGTTTATGGAGACAACAGTTCACTTATCTATCATCATGCCTATGGTTATGCACCCTATAGTCCATATTCACCTGCTACTTCG…	1
SlYTP6	Solyc05g032850.3	1815	ATGGAGGATACCAATCAGCAGAGCATCGATCCATTTACTTCTGTATCATCTTCAGGTGAAAGAGTTGAGGAGCCGCATAATGTTGCAGAACAGCCTATTTCACCCAAAGATGAAAGGATTGGTTCTGCAAATGCTTCTCCAGATGGAGCAATCCCTGGGGCTTCAAGAAATGTGCAAGATCATCCTGTTACCTCTGAAGCTGGAGCTATACCCACCTTTTATCCACTCAATTCCTATTCTCCTCAGGACCCAGGTCTTTACTATGGAGGTTACGACAATGGCACTGGAAGTTGGGTTGAACAATCAAATGATGGGAACGTGAACAACTTGCATGTCGCTCCACCAGGAATGTTCAATGAAAATCCACTCTTTTTCCCTCCTGGTTATGGCTTTGATCCA…	ATGGAGGATACCAATCAGCAGAGCATCGATCCATTTACTTCTGTATCATCTTCAGGTGAAAGAGTTGAGGAGCCGCATAATGTTGCAGAACAGCCTATTTCACCCAAAGATGAAAGGATTGGTTCTGCAAATGCTTCTCCAGATGGAGCAATCCCTGGGGCTTCAAGAAATGTGCAAGATCATCCTGTTACCTCTGAAGCTGGAGCTATACCCACCTTTTATCCACTCAATTCCTATTCTCCTCAGGACCCAGGTCTTTACTATGGAGGTTACGACAATGGCACTGGAAGTTGGGTTGAACAATCAAATGATGGGAACGTGAACAACTTGCATGTCGCTCCACCAGGAATGTTCAATGAAAATCCACTCTTTTTCCCTCCTGGTTATGGCTTTGATCCA…	1
SlYTP7	Solyc02g070240.3	2016	ATGGATGACGGAGAAGGAGGACTAAACTTTGATTTTGAAGGTGGCTTAGATACAGGGCCAACACACCCAACTGCATCTGTACCAGTAATACAAGCAGGTCCCGCCCCAAATGCTTCTGTTGCCGTAGTTCCTCCAGGCGGCGGTGTGGGGCTAGGAGGTGATGGTTCATTTGTTGGTAACCGTAGAAGTTTCAGGCAGACTGTTTGTAGGCATTGGCTGCGGTCCTTGTGTATGAAGGGTGATGCTTGTGGTTTCCTTCACCAGTATGATAAGTCCCGGATGCCCGTTTGCAGGTTCTTTAGACTCTATGGAGAGTGCCGTGAACAAGATTGTGTTTATAAGCACACCAATGAGGATATTAAAGAATGTAACATGTTTAAATTAGGATTTTGTCCGAAT…	ATGGATGACGGAGAAGGAGGACTAAACTTTGATTTTGAAGGTGGCTTAGATACAGGGCCAACACACCCAACTGCATCTGTACCAGTAATACAAGCAGGTCCCGCCCCAAATGCTTCTGTTGCCGTAGTTCCTCCAGGCGGCGGTGTGGGGCTAGGAGGTGATGGTTCATTTGTTGGTAACCGTAGAAGTTTCAGGCAGACTGTTTGTAGGCATTGGCTGCGGTCCTTGTGTATGAAGGGTGATGCTTGTGGTTTCCTTCACCAGTATGATAAGTCCCGGATGCCCGTTTGCAGGTTCTTTAGACTCTATGGAGAGTGCCGTGAACAAGATTGTGTTTATAAGCACACCAATGAGGATATTAAAGAATGTAACATGTTTAAATTAGGATTTTGTCCGAAT…	1
SlYTP8	Solyc12g099090.3	2073	ATGTATAATGAAGGAGCCCCTGAGTTTGTTGTTGATCAGGGATTATATTATCCACCTGCCACCAATTATGGTTATTTCTGTACAGGATTAGAATCACCTGGTGATTGGGATGGCCACCAAGGATTTTTTGGTCTGGATGGTCAGGATATTCAGTATATGGATGCTCAAACTGAAAGTTTCCCGTATGTATATTATACACCTAACTATGGATGTGCACAGTCTTCATATAACCCATACAACCCTTACATTCCTGGTGCCGTAGTAGGAGCTGATGGTCCATGTGCAGGGCCACAACATTACTACACAATTCCCCCTTACGAAAACTTGGGATCATCTTCGTACTTCCCGATGGCGGTGCCATCTACATCTAGTATTCCTGAGAATGCTGCAGATCCGATA…	ATGTATAATGAAGGAGCCCCTGAGTTTGTTGTTGATCAGGGATTATATTATCCACCTGCCACCAATTATGGTTATTTCTGTACAGGATTAGAATCACCTGGTGATTGGGATGGCCACCAAGGATTTTTTGGTCTGGATGGTCAGGATATTCAGTATATGGATGCTCAAACTGAAAGTTTCCCGTATGTATATTATACACCTAACTATGGATGTGCACAGTCTTCATATAACCCATACAACCCTTACATTCCTGGTGCCGTAGTAGGAGCTGATGGTCCATGTGCAGGGCCACAACATTACTACACAATTCCCCCTTACGAAAACTTGGGATCATCTTCGTACTTCCCGATGGCGGTGCCATCTACATCTAGTATTCCTGAGAATGCTGCAGATCCGATA…	1
SlYTP9	Solyc01g103540.3	1668/1713	ATGGCTGGTGAGAAGATTATAGAAAAACCTGAAGCTGTTGCTCCGGGACTGAAATCTGATCCCTCTAACAAACTGATTGAGAAGGATTTGGTTTCAAAAAAAGATGGAAAAGCTGCTGACTCGGTGGCTTCTTTGGGAGCTGTGACCAGCATCAAGTGTGAAAATGATCAACCACCTGCTGCAGAGCAAGGATATAATGGGACTTATAATCAGTTAGATGAGCAGGCTTACTTTAATGCGGGTGTTCAATCAGACAATGGTTCCCTTCTCTACTATATGCCTGGCTATAATCCTTACAGTGCTGGATTTGTGGGAGGCGATGGGAAGCAGCCCTATCCTTCGTCCGGATATCTCCAGCAACCTGTCTCATATGGTTCAGATTCCATGCCATGTTATACA…	>SlYTP9-1 ATGGCTGGTGAGAAGATTATAGAAAAACCTGAAGCTGTTGCTCCGGGACTGAAATCTGATCCCTCTAACAAACTGATTGAGAAGGATTTGGTTTCAAAAAAAGATGGAAAAGCTGCTGACTCGGTGGCTTCTTTGGGAGCTGTGACCAGCATCAAGTGTGAAAATGATCAACCACCTGCTGCAGAGCAAGGATATAATGGGACTTATAATCAGTTAGATGAGCAGGCTTACTTTAATGCGGGTGTTCAATCAGACAATGGTTCCCTTCTCTACTATATGCCTGGCTATAATCCTTACAGTGCTGGATTTGTGGGAGGCGATGGGAAGCAGCCCTATCCTTCGTCCGGATATCTCCAGCAACCTGTCTCATATGGTTCAGATTCCATGCC…	1
				>SlYTP9-2 ATGGCTGGTGAGAAGATTATAGAAAAACCTGAAGCTGTTGCTCCGGGACTGAAATCTGATCCCTCTAACAAACTGATTGAGAAGGATTTGGTTTCAAAAAAAGATGGAAAAGCTGCTGACTCGGTGGCTTCTTTGGGAGCTGTGACCAGCATCAAGTGTGAAAATGATCAACCACCTGCTGCAGAGCAAGGTGCTTATTATCCACCTACTAGCTATTGCGATTACTACTATCCAGGATATAATGGGACTTATAATCAGTTAGATGAGCAGGCTTACTTTAATGCGGGTGTTCAATCAGACAATGGTTCCCTTCTCTACTATATGCCTGGCTATAATCCTTACAGTGCTGGATTTGTGGGAGGCGATGGGAAGCAGCCCTATCCTTCGTC…	0.9737
