# Supplementary material
Source: MDPI journal article supplement (https://www.mdpi.com/2311-7524/10/5/522)
Supplement: s1 [file s1 › Supplementary Table S4.xlsx]

## Sheet: Table S4
	Table S4. The number and function information for each cis-acting element in SlYTP promoters.
			Cis-acting element name
			ABRE	ARE	CAT-box	CGTCA-motif	GARE-motif	LTR	MBS	MBSI	P-box	TATC-box	TGACG-motif	TC-rich repeats	TCA-element	TGA-element
			Number of Cis-acting element in each promoter
	Gene name	SlYTP1	3	1					1
		SlYTP2	1	3		1		1	1		1		1
		SlYTP3		3					1						2
		SlYTP4				1	2		1				1			1
		SlYTP5	4	2		1							1
		SlYTP6		1				3						1
		SlYTP7	3		1						1
		SlYTP8		3	1			1	1		1	1			1
		SlYTP9		2		1			2		1	1	1
			Function of each cis-acting element
			abscisic acid responsiveness	anaerobic induction	related to meristem expression	MeJA-responsiveness	gibberellin-responsiveness	low-temperature responsiveness	MYB binding site involved in drought-inducibility	MYB binding site involved in flavonoid biosynthetic genes regulation	gibberellin-responsiveness	gibberellin-responsiveness	MeJA-responsiveness	defense and stress responsiveness	salicylic acid responsiveness	auxin responsiveness
