# Supplementary material
Source: MDPI journal article supplement (https://www.mdpi.com/2311-7524/10/5/522)
Supplement: s1 [file s1 › Supplementary Table S5.xlsx]

## Sheet: Table S5
	Table S5. Predicted transcription factors binding with promoters of SlYTP4/5/6/7.
	TF	Target	TF name	TF tunction
	Solyc02g071730.2	SlYTP4 promoter	MIKC_MADS family protein	leaf /carpel / stamen development
	Solyc03g111590.2	SlYTP4 promoter	C2H2 family protein	response to brassinosteroid
	Solyc03g112930.2	SlYTP4 promoter	Dof family protein	procambium/phloem/xylem histogenesis
	Solyc04g008380.2	SlYTP4 promoter	BBR-BPC family protein	response to ethylene
	Solyc04g077210.2	SlYTP4 promoter	TALE family protein	xylem and phloem pattern formation
	Solyc04g081170.2	SlYTP4 promoter	BBR-BPC family protein	response to ethylene
	Solyc06g059970.2	SlYTP4 promoter	MIKC_MADS family protein	specification of floral organ identity
	Solyc06g071480.2	SlYTP4 promoter	Dof family protein	procambium/phloem/xylem histogenesis
	Solyc06g076030.2	SlYTP4 promoter	Dof family protein	photomorphogenesis
	Solyc10g077110.1	SlYTP4 promoter	C2H2 family protein	5S rDNA binding
	Solyc11g008560.1	SlYTP4 promoter	AP2 family protein	no description
	Solyc11g011260.1	SlYTP4 promoter	GRAS family protein	regulation of nitrogen utilization/response to ethylene/abscisic acid/salicylic acid/jasmonic acid/gibberellic/hyperosmotic salinity response
	Solyc00g024680.1	SlYTP5 promoter	Dof family protein	expressed in procambial cells of leaf primordia, roots and embryos, prior to the completion of xylem differentiation.
	Solyc01g005060.2	SlYTP5 promoter	C2H2 family protein	leaf morphogenesis/positive regulation of auxin biosynthetic process
	Solyc01g005630.1	SlYTP5 promoter	ERF family protein	response to reactive oxygen species/ethylene
	Solyc02g077360.1	SlYTP5 promoter	ERF family protein	response to chitin
	Solyc02g085580.2	SlYTP5 promoter	C2H2 family protein	regulation of gibberellic acid mediated signaling pathway/regulation of seed germination
	Solyc03g005520.1	SlYTP5 promoter	ERF family protein	ethylene-activated signaling pathway/defense response
	Solyc03g093550.1	SlYTP5 promoter	ERF family protein	response to chitin
	Solyc03g112930.2	SlYTP5 promoter	Dof family protein	procambium/phloem/xylem histogenesis
	Solyc03g115940.2	SlYTP5 promoter	Dof family protein	no description
	Solyc03g123500.2	SlYTP5 promoter	ERF family protein	detection of hypoxia
	Solyc04g008380.2	SlYTP5 promoter	BBR-BPC family protein	response to ethylene
	Solyc04g081170.2	SlYTP5 promoter	BBR-BPC family protein	response to ethylene
	Solyc05g009450.1	SlYTP5 promoter	ERF family protein	no description
	Solyc05g055500.1	SlYTP5 promoter	C2H2 family protein	no description
	Solyc06g062520.1	SlYTP5 promoter	Dof family protein	response to chitin
	Solyc06g071480.2	SlYTP5 promoter	Dof family protein	procambium/phloem/xylem histogenesis
	Solyc06g076030.2	SlYTP5 promoter	Dof family protein	photomorphogenesis
	Solyc07g053570.2	SlYTP5 promoter	C2H2 family protein	no description
	Solyc07g054220.1	SlYTP5 promoter	ERF family protein	response to chitin
	Solyc07g064890.1	SlYTP5 promoter	ERF family protein	pathogenesis-related
	Solyc08g081960.1	SlYTP5 promoter	ERF family protein	root/cotyledon development
	Solyc10g006130.1	SlYTP5 promoter	ERF family protein	no description
	Solyc10g009110.1	SlYTP5 promoter	ERF family protein	response to ethylene/abscisic acid/chitin/jasmonic acid
	Solyc11g008560.1	SlYTP5 promoter	AP2 family protein	no description
	Solyc11g011260.1	SlYTP5 promoter	GRAS family protein	regulation of nitrogen utilization/response to ethylene/abscisic acid/salicylic acid/jasmonic acid/gibberellic/hyperosmotic salinity response
	Solyc02g090220.2	SlYTP6 promoter	Dof family protein	response to auxin/salicylic acid
	Solyc03g116100.2	SlYTP6 promoter	MYB family protein	response to water deprivation/salt stress/abscisic acid/salicylic acid
	Solyc06g074170.2	SlYTP7 promoter	NAC family protein	seed germination/negative regulation of gibberellic acid mediated signaling pathway/cellular response to salt stress
	Solyc06g076030.2	SlYTP7 promoter	Dof family protein	photomorphogenesis
