# Supplementary material
Source: MDPI journal article supplement (https://www.mdpi.com/2311-7524/10/5/522)
Supplement: s1 [file s1 › Supplementary Table S6.xlsx]

## Sheet: Table S6
	Table S6. Predicted interaction proteins of SlYTP3/4/5/6/7.
	Protein name	Interaction proteins
		Gene ID	Predicted function
	SlYTP3	Solyc01g009290.2.1	Protein CLP1 homolog/Required for endonucleolytic cleavage during polyadenylation-dependent pre-mRNA 3'-end formation
		Solyc10g050540.1.1	RNA 3'-end processing/Tetratricopeptide repeat (TPR)-like superfamily protein
		Solyc03g025540.2.1	Cleavage and polyadenylation specificity factor 100
		Solyc12g099280.1.1	Fip1 motif-containing protein/Pre-mRNA 3'-end-processing factor
		Solyc07g005320.2.1	Homolog of yeast FIP1/Pre-mRNA 3'-end-processing factor
		Solyc01g009620.2.1	mRNA polyadenylation/Component of the cleavage factor Im (CFIm) complex
		Solyc03g007100.2.1	Cleavage and polyadenylation specificity factor 160
		Solyc12g038530.1.1	WD40-repeat-containing domain superfamily protein
		Solyc12g038540.1.1	WD40-repeat-containing domain superfamily protein
		Solyc12g038550.1.1	Transducin/WD40 repeat-like superfamily protein
	SlYTP4	Solyc01g009290.2.1	Protein CLP1 homolog; Required for endonucleolytic cleavage during polyadenylation-dependent pre-mRNA 3'-end formation
		Solyc10g050540.1.1	RNA 3'-end processing/Tetratricopeptide repeat (TPR)-like superfamily protein
		Solyc03g025540.2.1	Cleavage and polyadenylation specificity factor 100
		Solyc12g099280.1.1	Fip1 motif-containing protein/Pre-mRNA 3'-end-processing factor
		Solyc07g005320.2.1	Homolog of yeast FIP1/Pre-mRNA 3'-end-processing factor
		Solyc03g007100.2.1	Cleavage and polyadenylation specificity factor 160
		Solyc07g049480.2.1	Cleavage and polyadenylation specificity factor 73-I
		Solyc12g038530.1.1	WD40-repeat-containing domain superfamily protein
		Solyc12g038540.1.1	WD40-repeat-containing domain superfamily protein
		Solyc12g038550.1.1	Transducin/WD40 repeat-like superfamily protein
	SlYTP5	Solyc05g053210.2.1	Protein kinase-like domain superfamily
		Solyc10g018520.1.1	3'-5'-exoribonuclease activity
		Solyc12g098910.1.1	Protein serine/threonine kinase activity/ATP binding
		Solyc09g009600.1.1	Purple acid phosphatase-like
		Solyc03g111310.2.1	SNF1-related protein kinase regulatory subunit gamma 1
		Solyc04g011380.2.1	Putative zinc-finger domain protein
		Solyc02g071150.2.1	Double-stranded DNA-binding family protein
		Solyc02g014310.2.1	Glycine-rich protein/RNA-binding domain superfamily
		Solyc04g016490.2.1	Calcineurin-like phosphoesterase domain/Purple acid phosphatase 16
		Solyc07g052340.2.1	3'-5' exonuclease domain/Polynucleotidyl transferase, ribonuclease H fold protein with HRDC domain
	SlYTP6	Solyc10g018520.1.1	3'-5'-exoribonuclease activity
		Solyc01g007840.2.1	Poly(A)-specific ribonuclease; negative regulation of translation
		Solyc08g066730.2.1	RNA N6-methyladenosine methyltransferase complex/mRNAadenosine methylase/Belongs to the MT-A70-like family
		Solyc03g112520.2.1	FKBP12 interacting protein 37/mRNA methylation/regulation of alternative mRNA splicing, via spliceosome/
		Solyc04g011380.2.1	Putative zinc-finger domain
		Solyc07g063650.2.1	Ubiquitinyl hydrolase 1/Ubiquitin-specific protease 14
		Solyc01g090780.2.1	Transcription regulators//negative regulation of translation
		Solyc04g057990.2.1	Zinc finger C-x8-C-x5-C-x3-H type family protein
		Solyc05g013530.2.1	Octicosapeptide/Phox/Bem1p (PB1) domain-containing protein
		Solyc07g052340.2.1	3'-5' exonuclease domain/Polynucleotidyl transferase, ribonuclease H fold protein with HRDC domain
	SlYTP7	Solyc01g009290.2.1	Protein CLP1 homolog/Required for endonucleolytic cleavage during polyadenylation-dependent pre-mRNA 3'-end formation
		Solyc10g050540.1.1	RNA 3'-end processing/Tetratricopeptide repeat (TPR)-like superfamily protein
		Solyc03g025540.2.1	Cleavage and polyadenylation specificity factor 100
		Solyc12g099280.1.1	Fip1 motif-containing protein/Pre-mRNA 3'-end-processing factor
		Solyc07g005320.2.1	Homolog of yeast FIP1/Pre-mRNA 3'-end-processing factor
		Solyc03g007100.2.1	Cleavage and polyadenylation specificity factor 160
		Solyc07g049480.2.1	Cleavage and polyadenylation specificity factor 73-I
		Solyc12g038530.1.1	WD40-repeat-containing domain superfamily protein
		Solyc12g038540.1.1	WD40-repeat-containing domain superfamily protein
		Solyc12g038550.1.1	Transducin/WD40 repeat-like superfamily protein
